# Supplementary material for: Variability of the chronic obstructive pulmonary disease key epidemiological data in Europe: systematic review
Source: PubMed Central journal article supplement (PMC3037331; doi:10.1186/1741-7015-9-7), 2011-01-18
Supplement: 1741-7015-9-7-S3.pdf [file 1741-7015-9-7-S3.pdf]

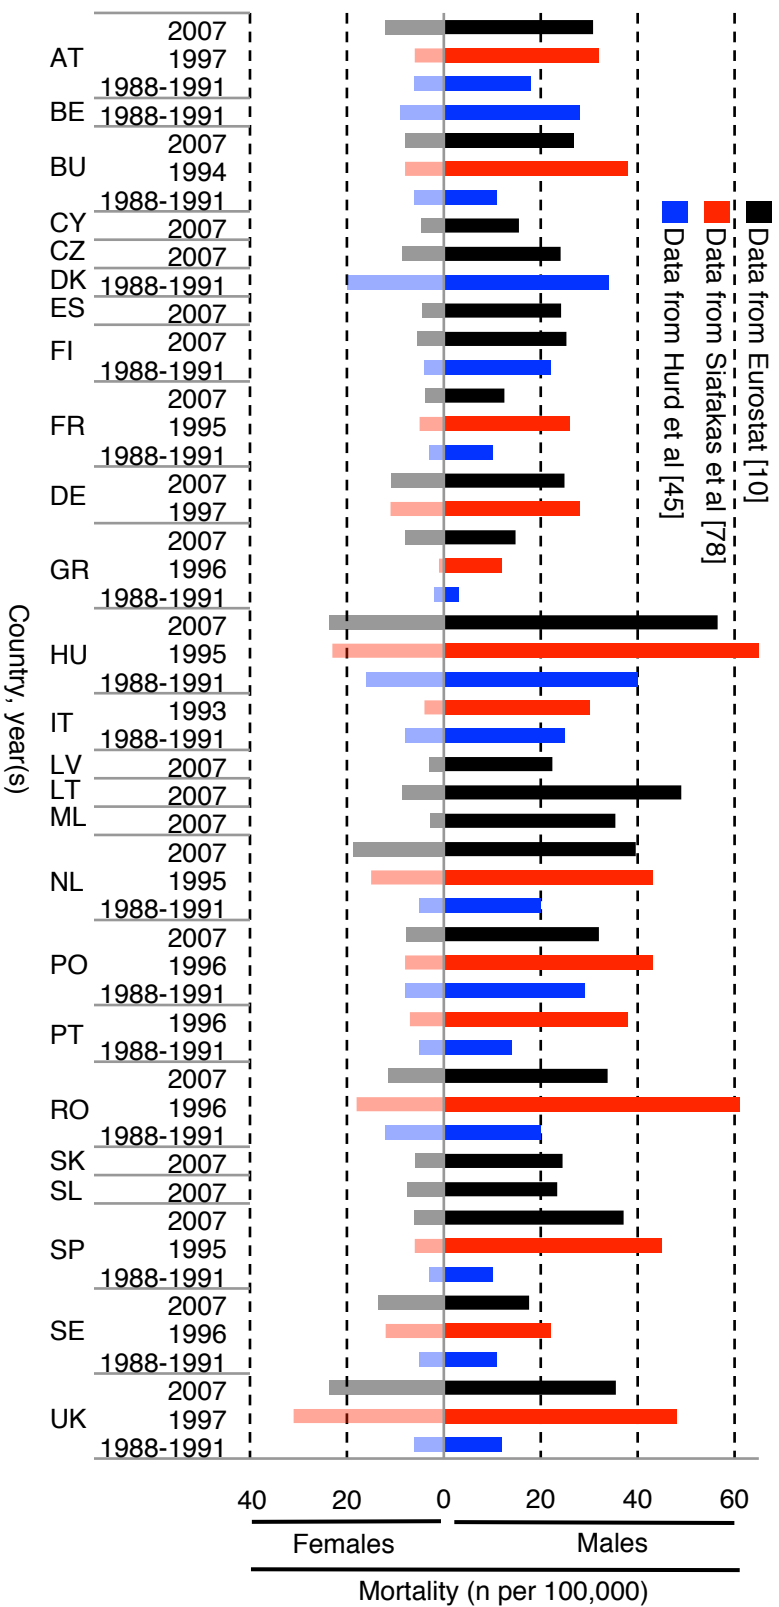

**Figure A3 – COPD age-standardized mortality rates (n per 100,000).**

In the three mentioned references, the following versions of the International Classification of the Disease and associated codes were used: [10], version 10 and codes J40–J44 and J47 (excepted for Greece where the estimates correspond to codes J40–J47); [45], version 9 and codes 490–493; [78], version 9 and codes 490-496.

COPD, Chronic Obstructive Pulmonary Disease.

Abbreviations for countries: AT, Austria; BE, Belgium; BU, Bulgaria; CY, Cyprus; CZ, Czech Republic; DK, Denmark; ES, Estonia; FI, Finland; FR, France; DE, Germany; GR, Greece; HU, Hungary; IR, Ireland; IT, Italy; LV, Latvia; LT, Lithuania; ML, Malta; NL, Netherlands; PO, Poland; PT, Portugal; RO, Romania; SK, Slovakia; SL, Slovenia; SP, Spain; SE, Sweden; UK, United Kingdom.
